# Supplementary material
Source: PubMed Central journal article supplement (PMC3864982)
Supplement: NIHMS519512-supplement-appendix.pdf [file NIHMS519512-supplement-appendix.pdf]

# Web-based Supplementary Materials for “Bayesian spatial transformation models with applications in neuroimaging data” by Michelle F. Miranda, Hongtu Zhu and Joseph G. Ibrahim

## Web Appendix A

In this web appendix, we present a sensitivity analysis of the hyper-parameters  $a$  and  $b$  of  $\lambda = \{\lambda_d; d \in \mathcal{D}\}$  and the hyper-parameters  $\phi_k$  of  $\beta$ . There are two goals. One is to examine the finite sample performance of STM and its associated parameter estimates under different scenarios. The other is to evaluate MCMC convergence through a diagnostic analysis.

**Sensitivity analysis for  $\Lambda$ .** We consider three different scenarios for  $(a, b)$  including  $(-2.0, 2.5)$ ,  $(-3.0, 3.0)$  and  $(-3.5, 3.5)$ . In most applications, the three scenarios of  $(a, b)$  represent a reasonable range of  $\lambda$ . Although it may be desirable to use a wider interval  $(a, b)$ , very flat priors can lead to slow convergence of the MCMC algorithm. We examine how STM recovers the geometric patterns presented in Section 3. Web Figure 1 reveals that regardless of the different choices of  $a$  and  $b$ , the STM is able to capture the true underlying pattern. Thus, STM is robust to the choice of the hyperparameters of  $\lambda_d$ .

**Geweke diagnostic statistics.** Under each scenario, we evaluate convergence at each voxel through the Geweke diagnosis statistics (Geweke, 1992). Web Table 1 presents the percentages of voxels, whose Geweke diagnosis statistics, computed after 1000 iterations of the Markov chain, are smaller than 1.96 (in absolute value). The numbers are shown to be very similar across the three scenarios for all parameters. Compared with other parameters, the  $\beta$ 's associated with the indicator variables  $\beta_2(d)$  and  $\beta_3(d)$  have a smaller proportion of voxels that converge.

**Trace plots for  $\nu_k$ .** We present the trace plots for the parameters  $\nu_k$  associated with each  $\beta_k$  under the three scenarios in Web Figure 2. Web Figure 2 reveals that the MCMC chains converge fast and the posterior estimates of  $\nu_k$  converge to their true values.

**Trace plots of  $\beta$ ,  $\tau_\sigma$  and  $\lambda$ .** Web Figure 3 presents the trace plots of  $\beta$ ,  $\tau_\sigma$  and  $\lambda$  for the scenario  $(a, b) = (-3.5, 3.5)$  in some selected voxels. For the sake of space, we omit their trace plots for other scenarios and voxels, since they are essentially similar to each other. Web Figure 3 reveals that the single-site Gibbs sampler algorithm has good convergence properties.

**Sensitivity analysis for  $\phi_k$ .** There are two strategies of determining  $\phi_k$ . First, for small and moderate  $N_D$ , it is possible to integrate  $\phi_k$  into the Gibbs sampler by sampling from

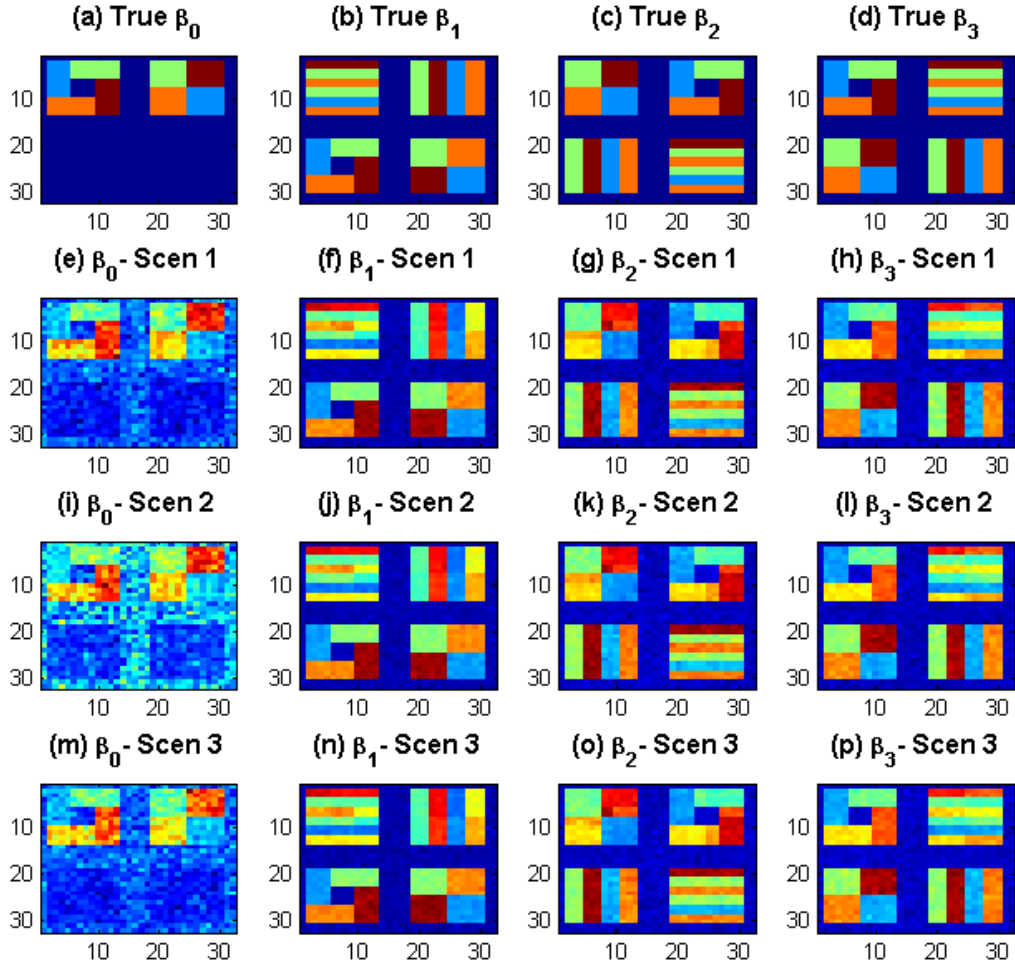

Web Figure 1: Sensitivity analysis of  $\lambda$ . Panels (a)-(d) represent the true pattern of  $\beta$  used to generate the images; (e)-(h): the posterior means of  $\beta$  obtained with  $(a, b) = (-2.0, 2.5)$ ; (i)-(l): the posterior means of  $\beta$  obtained with  $(a, b) = (-3.0, 3.0)$ ; and (m)-(p): the posterior means of  $\beta$  with  $(a, b) = (-3.5, 3.5)$ .

Web Table 1: Sensitivity analysis for  $\lambda$  indicating the percentages of voxels, whose Geweke diagnosis statistics are smaller than 1.96, according to the Geweke diagnosis statistics (Geweke, 1992) for each scenario considered.

| Scenario  | $(-2.0, 2.5)$ | $(-3.0, 3.0)$ | $(-3.5, 3.5)$ |
|-----------|---------------|---------------|---------------|
| $\lambda$ | 96.09         | 95.21         | 96.00         |
| $\tau$    | 94.53         | 94.63         | 93.65         |
| $\beta_0$ | 94.73         | 94.92         | 94.34         |
| $\beta_1$ | 93.55         | 94.63         | 94.92         |
| $\beta_2$ | 89.06         | 88.48         | 89.65         |
| $\beta_3$ | 89.06         | 88.28         | 89.94         |

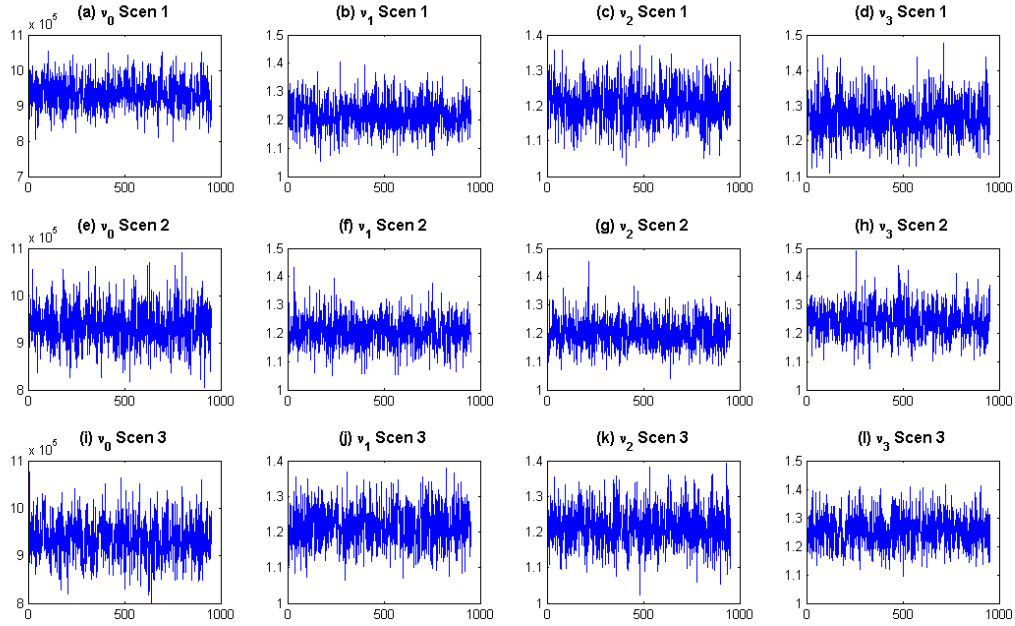

Web Figure 2: Trace plots of  $\nu_k$  for  $k = 0, \dots, 3$  after a burn-in of 50 iterations and a total of 1000 MCMC iterations under the three scenarios of  $(a, b)$ . Rows 1-3 correspond to  $(a, b) = (-2.0, 2.5)$ ,  $(a, b) = (-3.0, 3.0)$ , and  $(a, b) = (-3.5, 3.5)$ , respectively.

the full conditional distribution of  $\phi_k$ , which is proportional to  $p(\beta_k | \nu_k, \phi_k) p(\phi_k)$ , where  $p(\phi_k)$  is the prior of  $\phi_k$ . Different choices of  $\phi_k$  have been discussed in Ferreira and De Oliveira (2007). The conditional distribution for  $\phi_k$  does not have a simple form, but it can be easily sampled using the slice sampler (Neal, 2003). Sampling  $\phi_k$  requires the computation of the eigenvalues of a sparse  $N_D \times N_D$  matrix  $H_k$ . For an extremely large  $N_D$ , calculating the eigenvalues of  $H_k$  can be computationally infeasible. Second, it is common to pre-specify  $\phi_k$  in many applications. Thus, it is important to evaluate the effects of different hyperparameters  $\phi_k$  on parameter estimates.

Inspecting Web Figure 4 reveals that as  $\phi_0$  increases, the posterior estimates of  $\beta_0$  get worse, whereas there is no visual difference for other parameter estimates under different  $\phi_k$ . It is expected that the estimation of the model parameters becomes more and more difficult when  $\phi_k$  is large, since the effective sample size decreases as the correlation among observations increases. It results in a decrease of useful information about the parameters of interest, which is contained in the data (Ferreira and De Oliveira, 2007).

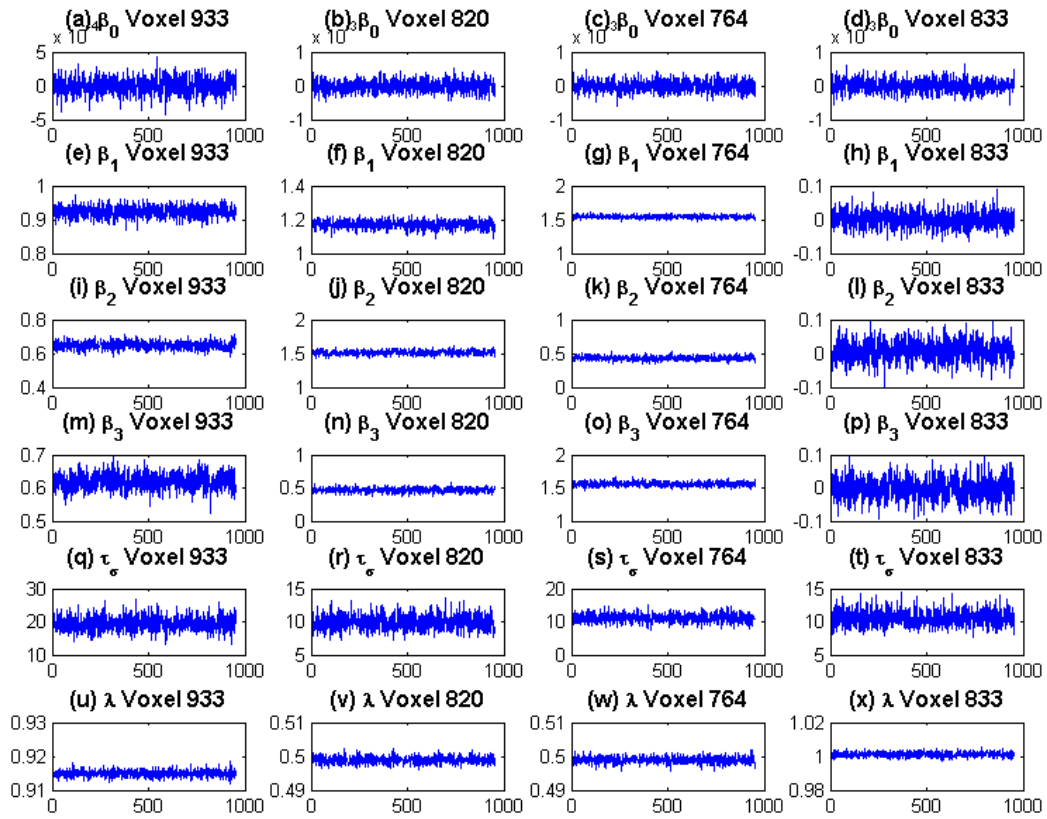

Web Figure 3: Trace plots of  $\beta$ ,  $\tau_\sigma$  and  $\lambda$  for the scenario  $(a, b) = (-3.5, 3.5)$  at 4 random selected voxels. The results show fast convergence of the MCMC chain for all parameters.

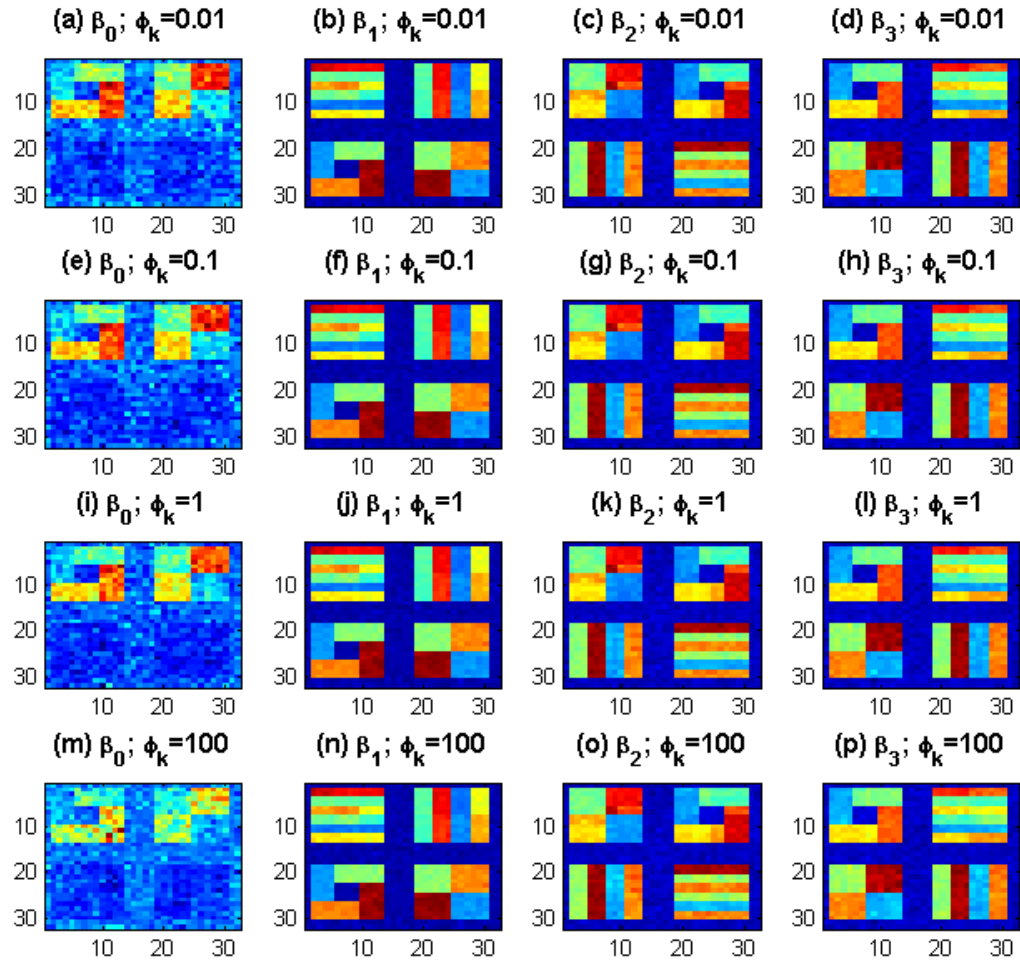

Web Figure 4: Posterior estimates of  $\beta$  for different values of  $\phi_k$ : (a)-(d):  $\phi_k = 0.01$ ; (e)-(h)  $\phi_k = 0.1$ ; (i)-(l)  $\phi_k = 1$ ; and (m)-(p):  $\phi_k = 100$ .

## Web Appendix B

The goal in this subsection is to examine the effects of different  $H_k$  on the parameter estimates of  $\beta$ . Recall that  $H_k$  is given by

$$h_k(d, d') = \begin{cases} \sum_{d' \in N(d)} \omega_k(d, d')^2, & \text{for } d = d', \\ -\omega_k(d, d')^2 \mathbf{1}(d' \in N(d)), & \text{for } d \neq d'. \end{cases}$$

Throughout the paper we consider  $\omega_k(d, d') = K(\|d - d'\|_2)$ , where  $K(u) = \exp(-\frac{1}{2}u^2) \mathbf{1}(u \leq 2)$ . The following possibilities are considered here:

(H.1) A constant kernel  $K(u) = \mathbf{1}(u \leq 2)$ , meaning all neighbors of the voxel  $d$  are given the same weights,  $\omega_k(d, d') = \mathbf{1}(\|d - d'\|_2 \leq 2)$ ;

(H.2) The Gaussian kernel  $K(u) = \exp(-\frac{1}{2}u^2) \mathbf{1}(u \leq r_0)$ , for  $r_0 = 0, 4, 6$ .

Other hyperparameters were chosen as described in Section 3 of the paper. As shown in Web Figure 5, the corresponding estimates of the intercept in all cases are quite poor, whereas the estimates for the remaining parameters are quite accurate for all cases considered.

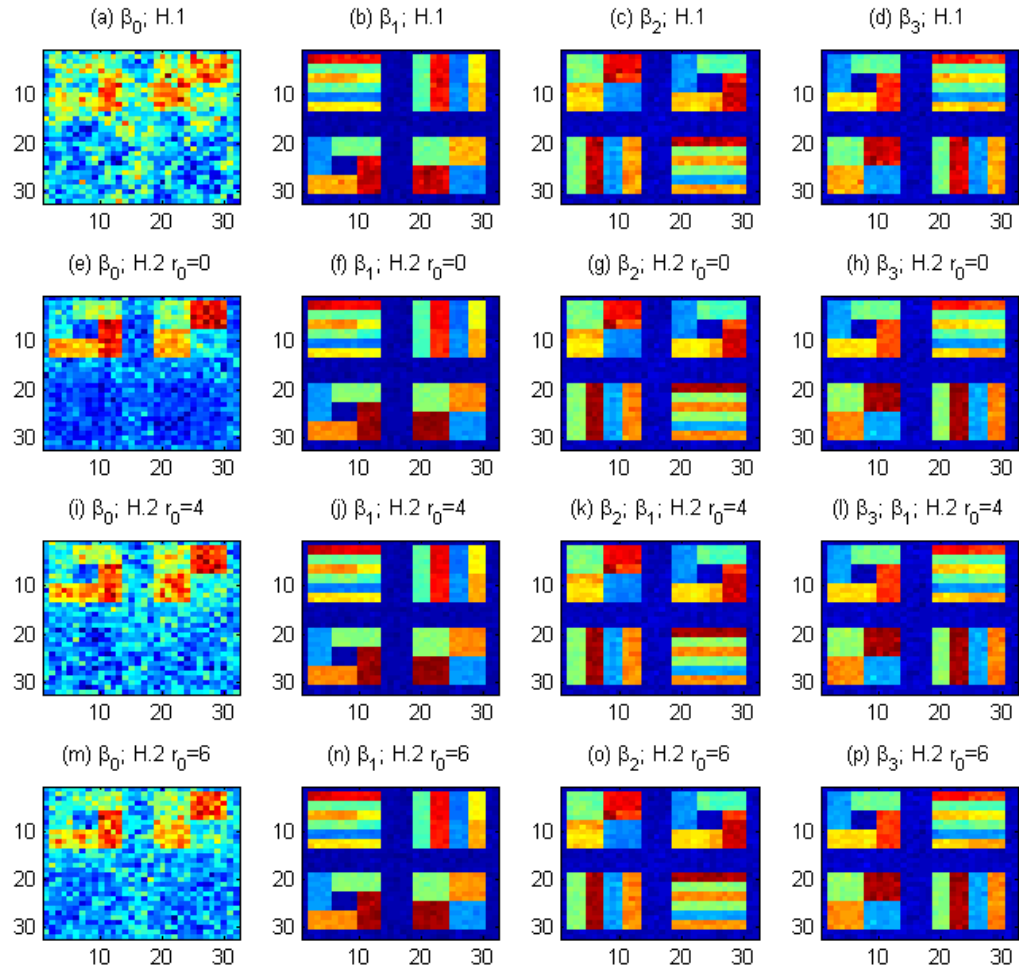

Web Figure 5: Posterior estimates of  $\beta$  under different specifications of  $H_k$ . Panels (a)-(d): case (H.1); (e)-(p): case (H.2) for  $r_0 = 0, 4, 6$ .

## Web Appendix C

Our goal is to examine the parameter estimates obtained from STM, when the true model corresponds to  $\lambda_d = 1$  for all  $d \in \mathcal{D}$ . Web Figure 6 shows that the STM can reliably recover the true pattern in the  $\beta$  images. Web Figure 7 reveals that the estimated  $\lambda_d$ 's are close to the true value 1.

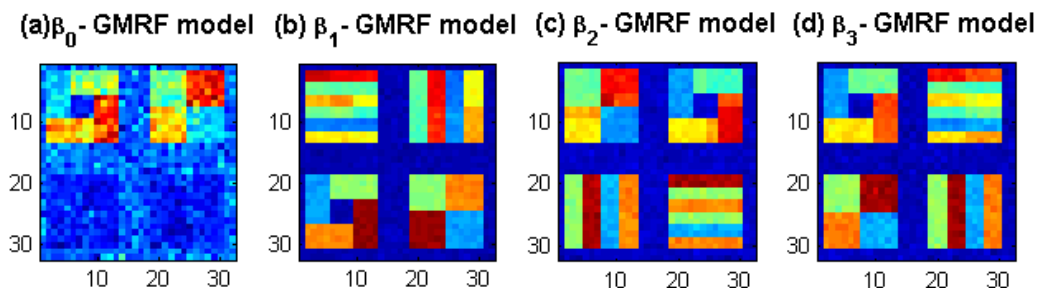

Web Figure 6: The posterior estimates of  $\beta$  for the true model with  $\lambda_d = 1$  for all  $d \in \mathcal{D}$ .

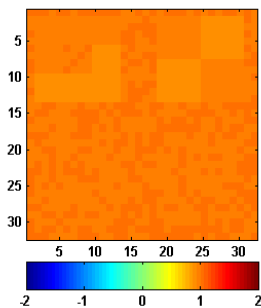

Web Figure 7: The posterior estimated image  $\hat{\Lambda} = \{\hat{\lambda}_d : d \in \mathcal{D}\}$  for the true underlying model with  $\lambda_d = 1$  for all  $d \in \mathcal{D}$ .



## Web Appendix D

In this subsection we present the estimated  $\hat{\beta}_k$  images for the intercept, gender, age, and ADHD status. Web Figures 8, 9, 10 and 11, respectively, show the results. The maps include the posterior mean, the standard deviation and the standardized images given by  $\hat{\beta}_k/\widehat{\text{std}}(\hat{\beta}_k)$ .

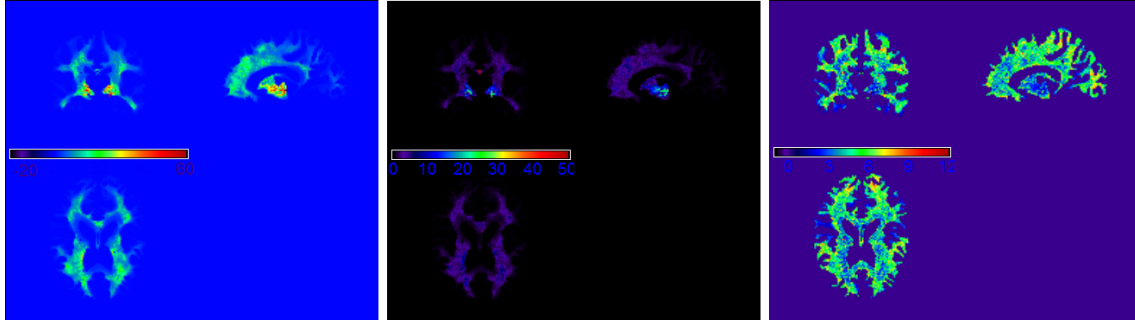

Web Figure 8: The posterior mean, the posterior standard deviation (SD), and the standardized value (mean/SD) images corresponding to the intercept  $\beta_0$  are shown from the left to the right, respectively.

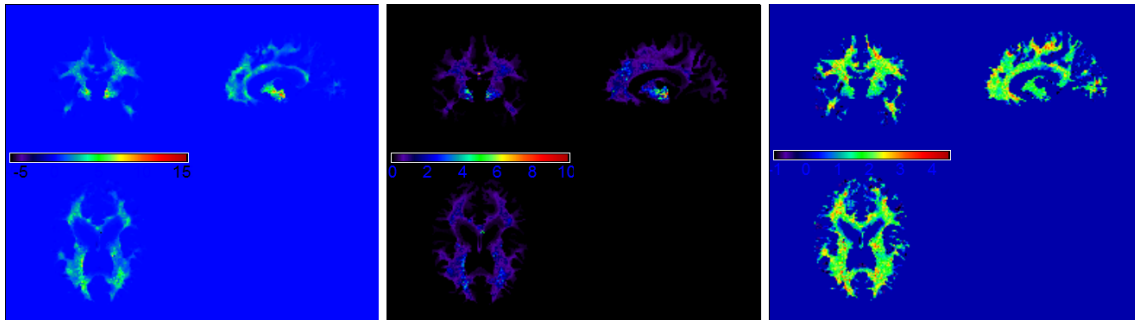

Web Figure 9: The posterior mean, the posterior standard deviation (SD), and the standardized value (mean/SD) images corresponding to the gender  $\beta_1$  are shown from the left to the right, respectively.

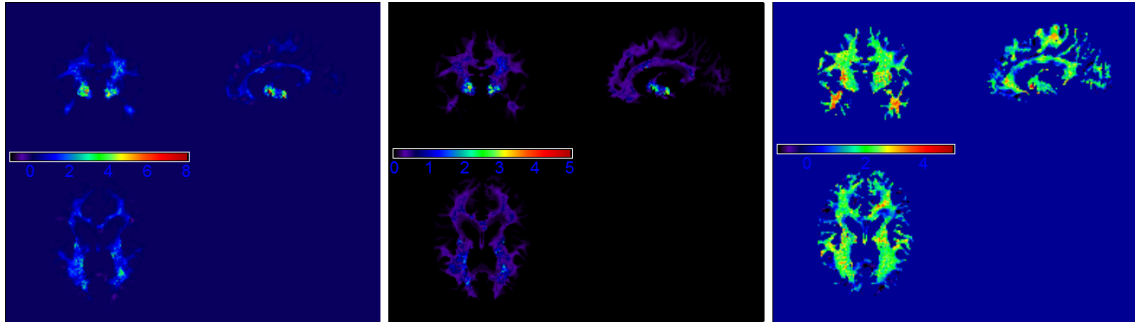

Web Figure 10: The posterior mean, the posterior standard deviation (SD), and the standardized value (mean/SD) images corresponding to the age  $\beta_2$  are shown from the left to the right, respectively.

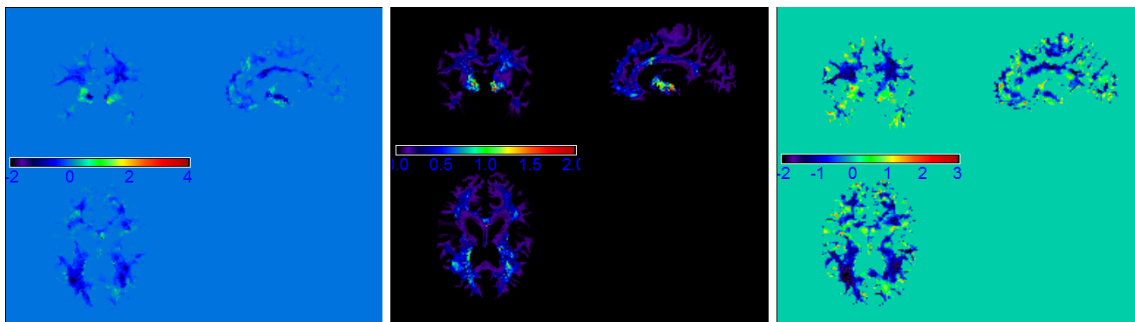

Web Figure 11: The posterior mean, the posterior standard deviation (SD), and the standardized value (mean/SD) images for the ADHD status  $\beta_3$  are shown from the left to the right, respectively.

## References

- Ferreira, M. A. R. and De Oliveira, V. (2007). Bayesian reference analysis for gaussian markov random fields. *Journal of Multivariate Analysis* **98**, 789–812.
- Geweke, J. (1992). Evaluating the accuracy of sampling-based approaches to calculating posterior moments. In Bernardo, J. M., Berger, J., Dawid, A. P., and Smith, J. F. M., editors, *Bayesian Statistics 4*, pages 169–193. Oxford University Press, Oxford.
- Neal, R. M. (2003). Slice sampling. *The Annals of Statistics* **31**, pp. 705–741.
